# Supplementary material
Source: publisher figshare collection journal article supplement (https://acs.figshare.com/ndownloader/files/25522728)
Supplement: Supplementary file 1 [file 25522728]

## Supplemental Material

**Title:** Metabolic profiling of nuciferine *in vivo* and *in vitro*

**Authors:** Hua Gao, Lei Zhang, An Zhu, Xiaoyan Liu, Tianxia Wang, Meiqi Wan,

Xiuwei Yang, Yingtao Zhang, Youbo Zhang

**Supplemental Table 1.** ADMET Properties of CYPs

| Enzyme  | Substr    | Sites                    |
|---------|-----------|--------------------------|
| CYP1A2  | Yes (88%) | C17, C15, N              |
| CYP2A6  | Yes (69%) | C17, C8                  |
| CYP2B6  | Yes (79%) | C17, C8, C15, C10, C19   |
| CYP2C8  | Yes (77%) | C17, C19, C8, C18        |
| CYP2C9  | Yes (61%) | C17, C19, C8, C18        |
| CYP2C19 | Yes (71%) | C17, C19                 |
| CYP2D6  | Yes (82%) | C19, C17, C18, C15       |
| CYP2E1  | Yes (90%) | C17, C19, C18            |
| CYP3A4  | Yes (98%) | C17, C19, C8, C18, N, C7 |

**Supplemental Table 2.** ADMET Properties of UGTs

| Enzyme | UGT1A1   | UGT1A3   | UGT1A4    | UGT1A6   | UGT1A8   | UGT1A9   | UGT1A10  | UGT2B7   | UGT2B15  |
|--------|----------|----------|-----------|----------|----------|----------|----------|----------|----------|
| Substr | No (98%) | No (98%) | Yes (98%) | No (97%) | No (98%) | No (96%) | No (97%) | No (96%) | No (98%) |

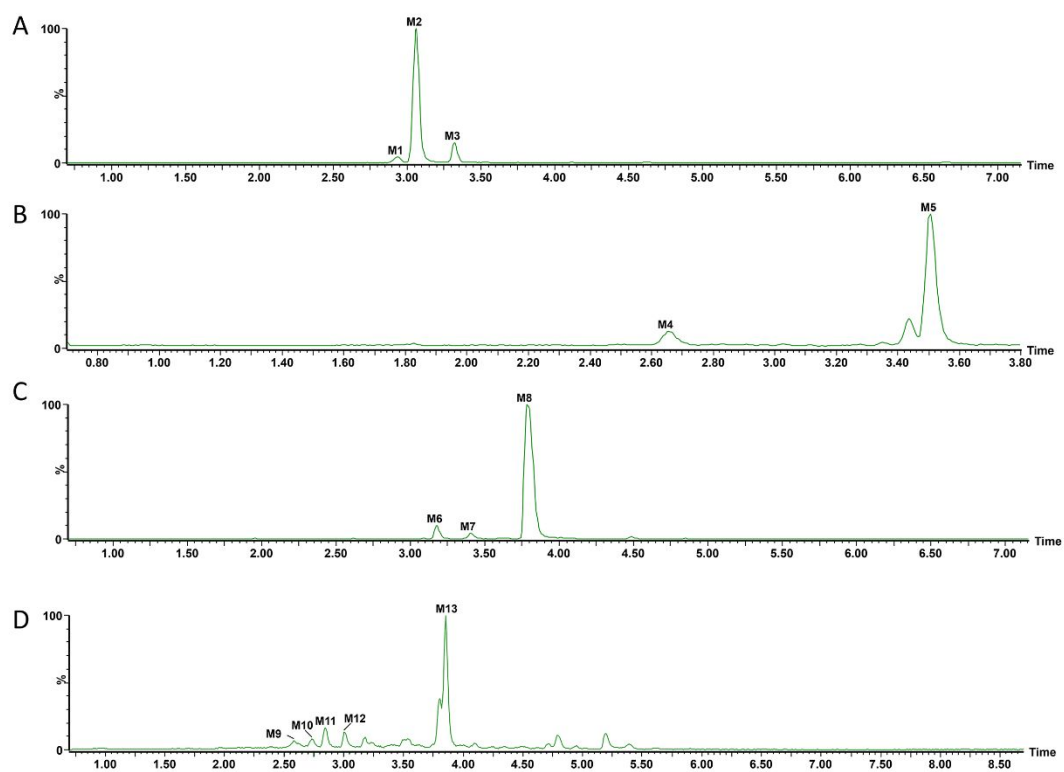

**Supplemental Fig 1.1**

**Supplemental Fig 1.1** Chromatograms of Phase I metabolites of NF: (A) M1, M2, M3; (B) M4, M5; (C) M6, M7, M8; (D) M9, M10, M11, M12, M13

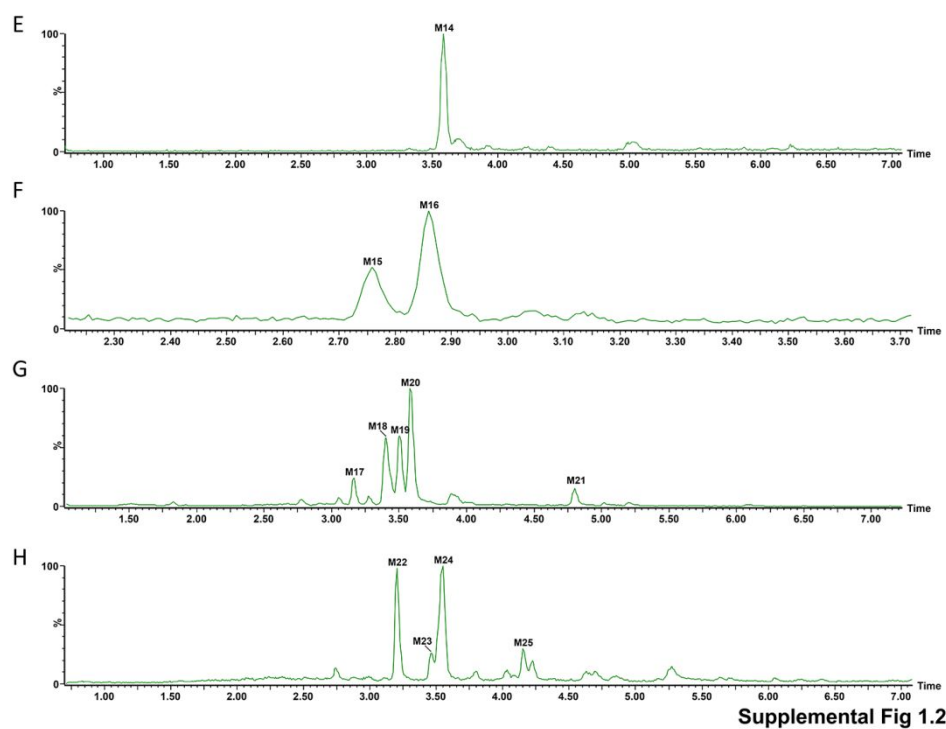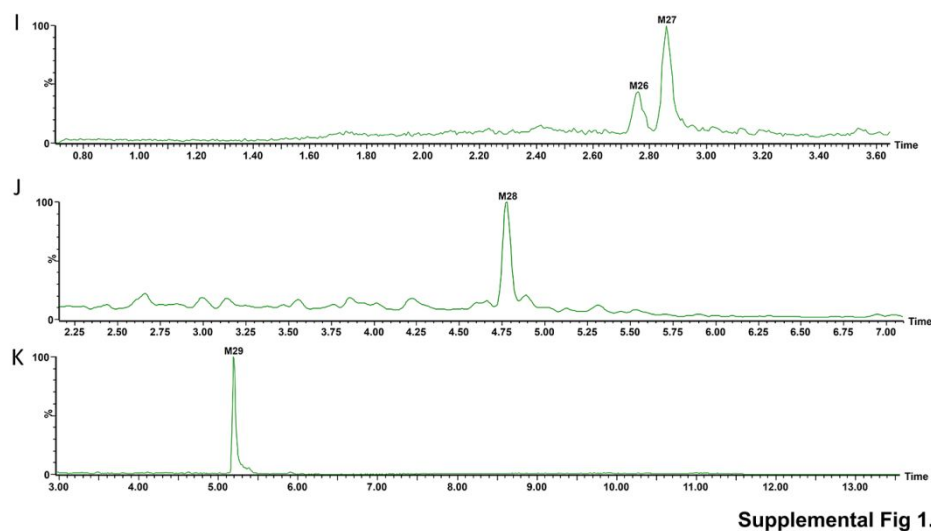

**Supplemental Fig 1.2**  
Chromatograms of

Phase I metabolites of NF: (E) M14; (F) M15, M16; (G) M17, M18, M19, M20, M21; (H) M22, M23, M24, M25

**Supplemental Fig 1.3** Chromatograms of Phase I metabolites of NF: (I) M26, M27; (J) M28; (K) M29

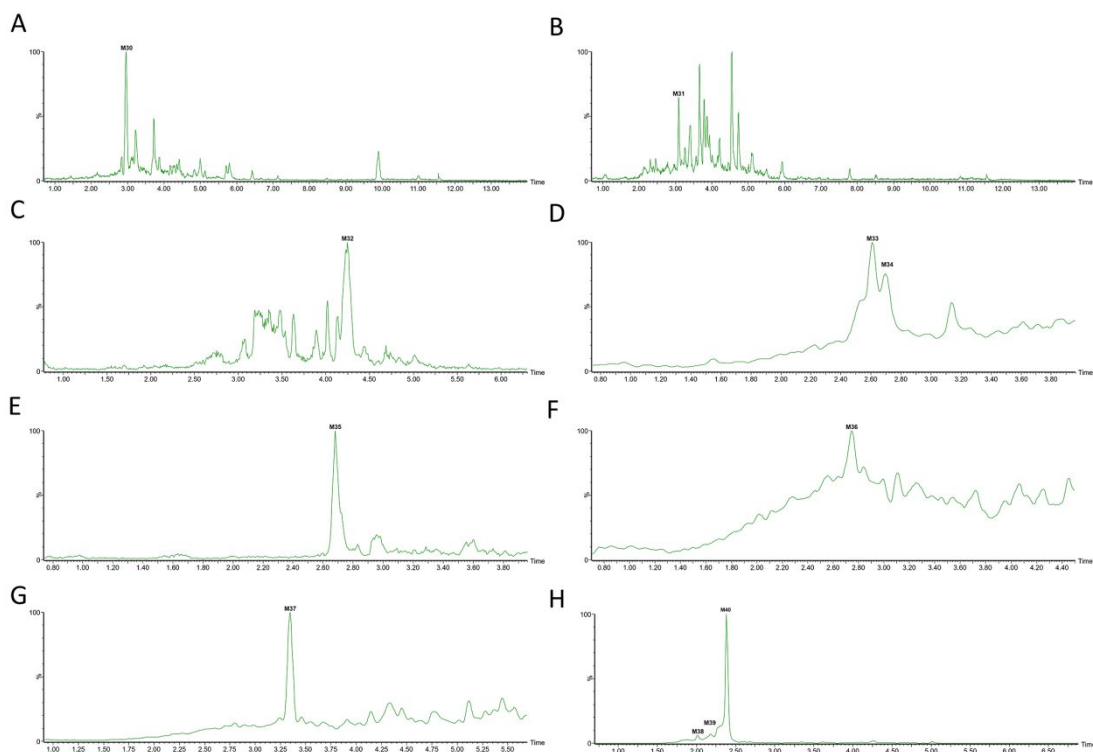

**Supplemental Fig 2.1**

**Supplemental Fig 2.1** Chromatograms of Phase II metabolites of NF: (A) M30; (B) M31; (C) M32; (D) M33, M34; (E) M35; (F) M36; (G) M37; (H) M38, M39, M40

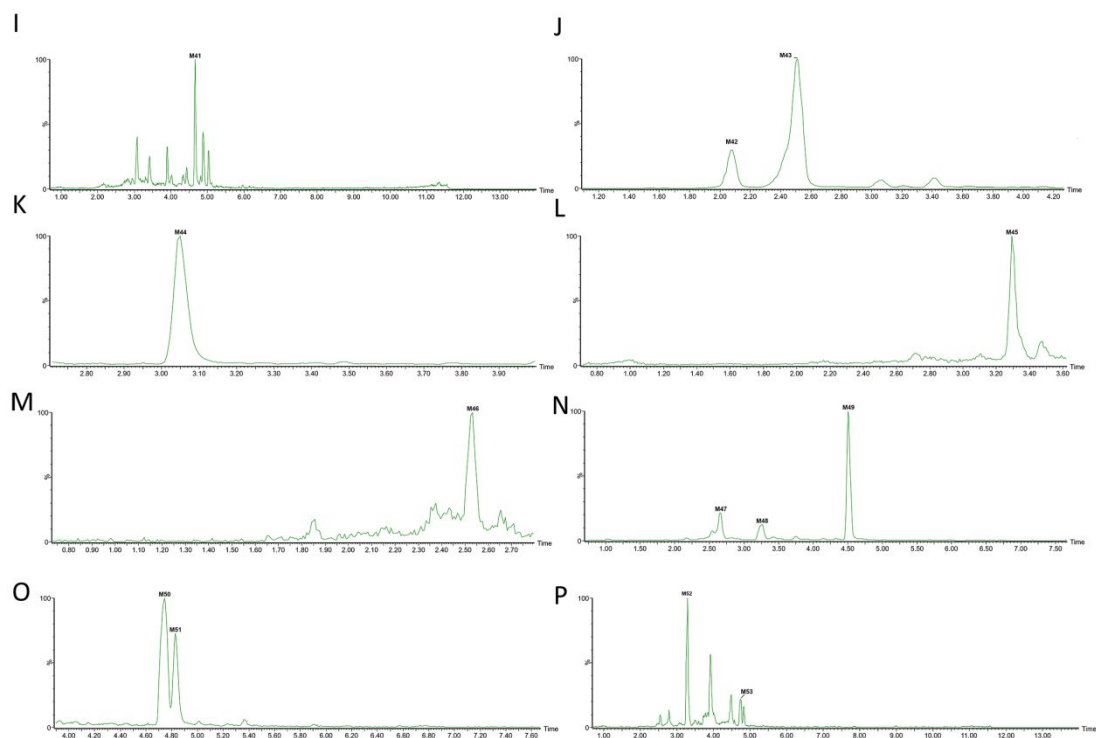

**Supplemental Fig 2.2**

**Supplemental Fig 2.2** Chromatograms of Phase II metabolites of NF: (I) M41; (J) M42, M43; (K) M44; (L) M45; (M) M46; (N) M47, M48, M49; (O) M50, M51; (P) M52, M53

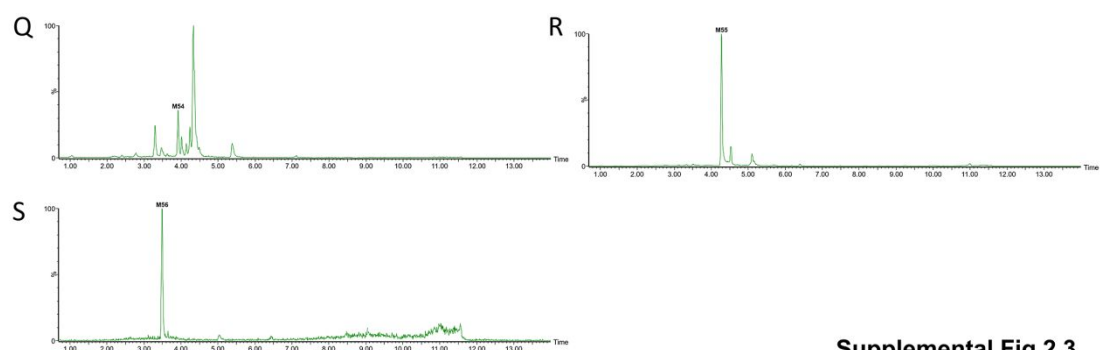

**Supplemental Fig 2.3**

**Supplemental Fig 2.3** Chromatograms of Phase II metabolites of NF: (Q) M54; (R) M55; (S) M56

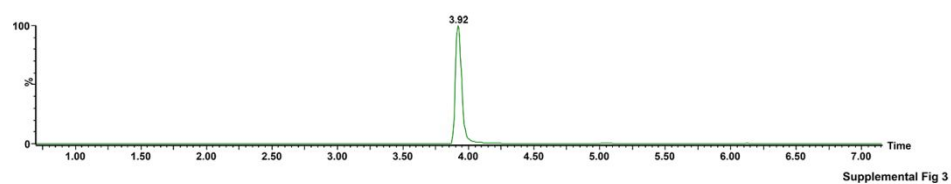

**Supplemental Fig 3**

**Supplemental Fig 3** Chromatograms of NF
